# Supplementary material for: Genomic and environmental selection patterns in two distinct lettuce crop–wild hybrid crosses
Source: PubMed Central journal article supplement (PMC3684739; doi:10.1111/eva.12043), 2013-01-24
Supplement: eva0006-0569-SD1.pdf [file eva0006-0569-SD1.pdf]

## Supporting information

**Data S1** Eqn 1 in Hooftman et al. 2005

$$\text{no. of capitula} = 50 \cdot 6 (\text{no. of branches}) + 177 (\text{no. of shoots}) - 5 \cdot 3$$

(Regression analysis:  $R^2 = 0.51$ ,  $P < 0.001$ ,  $n = 315$  plants)

**Table S1** Weather conditions in Sijbekarspel (SB) and Wageningen (WG) during the period of the experiment (May—October). In Sijbekarspel, we used a data logger to record temperature and humidity levels. Daily temperature and rainfall in Wageningen was electronically available from the Haarweg weather station ([www.met.wau.nl](http://www.met.wau.nl)) that was located about one km from the site.

|                                                 | Sijbekarspel | Wageningen |
|-------------------------------------------------|--------------|------------|
| Average temperature (°C )                       | 15.5         | 14.8       |
| Relative humidity (%)                           | 85.2         | 79.5       |
| Highest average maximum daily temperature (°C ) | 27.4         | 27.9       |
| Lowest average minimum daily temperature (°C )  | 5.0          | 4.3        |

**Table S2** Positions of quantitative trait loci (QTL) for seeds produced per seed sown (SPSS) in a recombinant inbred lines population from a *Lactuca sativa* cv. Salinas × *Lactuca serriola* (UC96US23) cross using composite interval mapping. Other RIL QTL results are described in detail in Hartman et al. (2012). A positive additive effect indicates that crop genomic background (*L. sativa*) causes higher trait values, whereas a negative additive effect indicates that the wild genomic background (*L. serriola*) causes higher values. QTL on the same line have peak values within 5 cM. PVE = Percentage Variation Explained; Abbreviations are listed in Table 1.

| LG | Trait | Position | one-LOD interval | Additive effect | PVE  | LOD                 | Position | one-LOD interval | Additive effect | PVE  | LOD |
|----|-------|----------|------------------|-----------------|------|---------------------|----------|------------------|-----------------|------|-----|
|    |       |          |                  |                 |      | <b>Sijbekarspel</b> |          |                  |                 |      |     |
|    |       |          |                  |                 |      | <b>Wageningen</b>   |          |                  |                 |      |     |
| 3  | SPSS  |          |                  |                 |      |                     | 40.8     | 40.3–41.0        | -21.57          | 12.5 | 4.8 |
|    | SPSS  |          |                  |                 |      |                     | 75.5     | 72.7–77.5        | 21.93           | 13.5 | 4.3 |
| 5  | SPSS  | 148.0    | 147.2–150.2      | 14.61           | 10.0 | 4.0                 | 148.0    | 146.6–150.6      | 20.40           | 11.4 | 4.8 |
| 7  | SPSS  | 18.5     | 18.4–21.5        | -19.36          | 17.9 | 7.2                 | 19.9     | 19.4–22.2        | -28.02          | 21.3 | 8.3 |
|    | SPSS  | 76.7     | 75.1–77.3        | -29.84          | 16.1 | 6.5                 |          |                  |                 |      |     |
